# Supplementary material
Source: PubMed Central journal article supplement (PMC4967727)
Supplement: supp_gfv447_gfv447supp.pdf [file supp_gfv447_gfv447supp.pdf]

**Supplementary Figure S1. Selection of 73 miRNA genes comprising 96 miRNAs with conserved expression in kidney.**

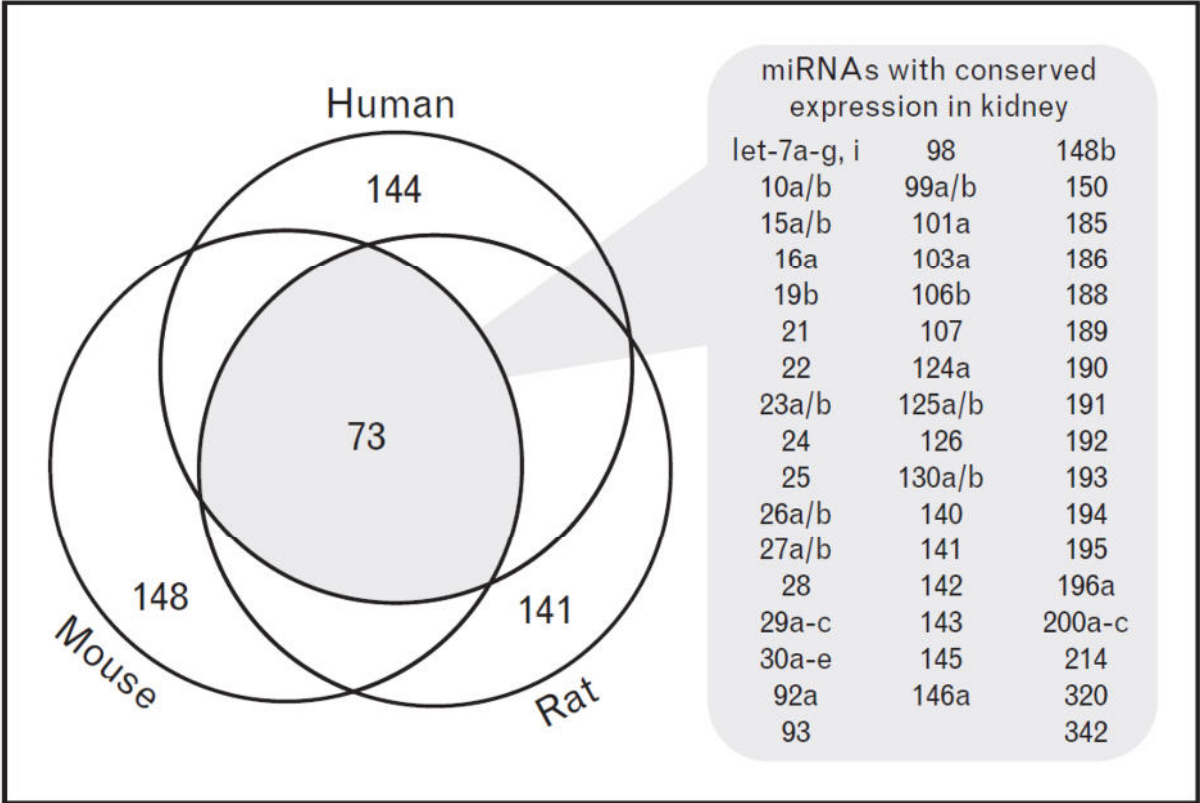

Source: Saal S, Harvey SJ (2009) MicroRNAs and the kidney: coming of age. *Curr Opin Nephrol Hypertens* 18: 317-323

**Supplementary Table S1. Targets, oligo nucleotides, and coverage statistics.**

88 stem-loop regions of miRNA genes were sufficiently covered: *MIR1011, MIR1012, MIR103A1, MIR103A2, MIR106B, MIR107, MIR10B, MIR1242, MIR125A, MIR125B1, MIR125B2, MIR126, MIR130A, MIR130B, MIR140, MIR141, MIR142, MIR143, MIR145, MIR146A, MIR148B, MIR150, MIR15A, MIR15B, MIR185, MIR186, MIR188, MIR190B, MIR191, MIR192, MIR193A, MIR193B, MIR1941, MIR1942, MIR195, MIR196A1, MIR19B1, MIR19B2, MIR200A, MIR200C, MIR21, MIR214, MIR22, MIR23B, MIR241, MIR25, MIR26A1, MIR26A2, MIR26B, MIR27A, MIR27B, MIR28, MIR29A, MIR29B1, MIR29C, MIR30A, MIR30B, MIR30C1, MIR30C2, MIR30D, MIR30E, MIR320A, MIR320B1, MIR320B2, MIR320C2, MIR320D1, MIR320D2, MIR320E, MIR342, MIR516A1, MIR516A2, MIR92A1, MIR92A2, MIR93, MIR98, MIR99A, MIR99B, MIRLET7A1, MIRLET7A2, MIRLET7A3, MIRLET7B, MIRLET7C, MIRLET7D, MIRLET7E, MIRLET7F1, MIRLET7F2, MIRLET7G, MIRLET7I*

8 target miRNAs were not sufficiently covered: *MIR10A, MIR1241, MIR1243, MIR196A2, MIR200B, MIR23A, MIR242, MIR320C1*

| <b>HGNC Gene Symbol</b> | <b>Stem Loop Sequence</b>                                                                                                  | <b>5' flanking Oligo</b>   | <b>3' flanking Oligo</b>   | <b>hg19 Position of Target</b> | <b>Target Size</b> | <b>Median Coverage</b> |
|-------------------------|----------------------------------------------------------------------------------------------------------------------------|----------------------------|----------------------------|--------------------------------|--------------------|------------------------|
| <b><i>MIR1011</i></b>   | TGCCCTGGCTCAGTTATCACAGTGCTGAT<br>GCTGTCTATTCTAAAGGTACAGTACTGTGA<br>TAACTGAAGGATGGCA                                        | ATTTCCAGCCTCA<br>CCTACTTGC | TTCTTCCTGGGT<br>ACGGTGAG   | chr1:65524091-<br>65524337     | 246                | 392,59                 |
| <b><i>MIR1012</i></b>   | ACTGTCCTTTTTCGGTTATCATGGTACCGA<br>TGCTGTATATCTGAAAGGTACAGTACTGTG<br>ATAACTGAAGAATGGTGGT                                    | GCGGAAAACAG<br>CCTATTTGAG  | CAAGCTCCTGG<br>TTTTTCATGC  | chr9:4850182-<br>4850442       | 260                | 574,36                 |
| <b><i>MIR103A1</i></b>  | TACTGCCCTCGGCTTCTTTACAGTGCTGC<br>CTTGTTGCATATGGATCAAGCAGCATTGTA<br>CAGGGCTATGAAGGCATTG                                     | AAGGCAGCTAT<br>GCTCACCAC   | TTCTCTTCCAAA<br>CAAAGAATCC | chr5:167987814-<br>167988033   | 219                | 436,13                 |
| <b><i>MIR103A2</i></b>  | TTGTGCTTTTACGCTTCTTTACAGTGCTGCC<br>TTGTAGCATTCAAGTCAAGCAGCATTGTAC<br>AGGGCTATGAAAGAACCA                                    | CCCTAGGGAGG<br>AATCCAGAG   | AAGCCATAAGCT<br>GCACCAAC   | chr20:3898061-<br>3898257      | 196                | 1021,09                |
| <b><i>MIR106B</i></b>   | CCTGCCGGGGCTAAAGTGCTGACAGTGCA<br>GATAGTGGTCTCTCCGTGCTACCGCACT<br>GTGGGTA CTGCTGCTCCAGCAGG                                  | AAAGGGGTAGC<br>TCCTTACCG   | CAAGACGGGAG<br>GACAGAAAG   | chr7:99691501-<br>99691733     | 232                | 221966,23              |
| <b><i>MIR107</i></b>    | CTCTCTGCTTTACGCTTCTTTACAGTGTTG<br>CCTTGTGGCATGGAGTTCAAGCAGCATTG<br>TACAGGGCTATCAAAGCACAGA                                  | AGGTCTGAGCAT<br>CCTTGAC    | GTTCCATGCCTC<br>AACTCCTC   | chr10:91352316-<br>91352625    | 309                | 131,51                 |
| <b><i>MIR10A</i></b>    | GATCTGTCTGTCTTCTGTATATACCCTGTA<br>GATCCGAATTTGTGTAAGGAATTTTGTGGT<br>CACAAATTCGTATCTAGGGGAATATGTAGT<br>TGACATAAACACTCCGCTCT | AGACTCGCACT<br>GCCTTTTTTC  | CCAGTCACCAG<br>ACTGTCCTC   | chr17:46657145-<br>46657423    | 278                | 1,65                   |
| <b><i>MIR10B</i></b>    | CCAGAGGTTGTAACGTTGTCTATATATAACC<br>CTGTAGAACCGAATTTGTGTGGTATCCGTA                                                          | CAAGCCCATTAG<br>GCTACCTG   | CCGGCTGCTTC<br>TAGTCTCC    | chr2:177014932-<br>177015177   | 245                | 444,56                 |

|                 |                                                                                                                           |                              |                          |                               |     |        |
|-----------------|---------------------------------------------------------------------------------------------------------------------------|------------------------------|--------------------------|-------------------------------|-----|--------|
|                 | TAGTCACAGATTCTGATTCTAGGGGAATATA<br>TGGTCGATGCAAAAACCTTCA                                                                  |                              |                          |                               |     |        |
| <b>MIR1241</b>  | AGGCCTCTCTCTCCGTGTTACAGCGGAC<br>CTTGATTTAAATGTCCATACAATTAAGGCA<br>CGCGGTGAATGCCAAGAATGGGGCTG                              | TACCCACCCCTC<br>TTCCTTTC     | TGCATCTCTAAG<br>CCCCTGTC | chr8:9760722-<br>9761027      | 305 | 0,00   |
| <b>MIR1242</b>  | ATCAAGATTAGAGGCTCTGCTCTCCGTGTT<br>CACAGCGGACCTTGATTTAATGTCATACAA<br>TTAAGGCACGCGGTGAATGCCAAGAGCG<br>GAGCCTACGGCTGCACTTGAA | AGACAGGAGCT<br>GGGCTTATG     | ATTTATGCGGCA<br>AGAGATGG | chr8:65291613-<br>65291887    | 274 | 232,45 |
| <b>MIR1243</b>  | TGAGGGCCCCTCTGCGTGTTACAGCGGA<br>CCTTGATTTAATGTCTATAACAATTAAGGCA<br>CGCGGTGAATGCCAAGAGAGGCGCCTCC                           | AAGACGCCTGA<br>GCGTTTCG      | ATTGTTGCGCG<br>GATTTGTC  | chr20:61809774-<br>61810039   | 265 | 0,00   |
| <b>MIR125A</b>  | TGCCAGTCTCTAGGTCCCTGAGACCCTTT<br>AACCTGTGAGGACATCCAGGGTCACAGGT<br>GAGGTTCTTGGGAGCCTGGCGTCTGGCC                            | CCCCTCCCGATA<br>TCTCTCTG     | TGCTCTGGAGG<br>AAGGGTATG | chr19:52196393-<br>52196642   | 249 | 475,08 |
| <b>MIR125B1</b> | TGCGCTCCTCTCAGTCCCTGAGACCCTAA<br>CTTGTGATGTTTACCGTTTAAATCCACGGG<br>TTAGGCTCTTGGGAGCTGCGAGTCGTGCT                          | CCATACCACCTG<br>TTTGTTCG     | AGCTGCCACTCT<br>CTGGTCAC | chr11:121970349-<br>121970631 | 282 | 173,19 |
| <b>MIR125B2</b> | ACCAGACTTTTCCTAGTCCCTGAGACCCTA<br>ACTTGTGAGGTATTTTAGTAACATCACAAG<br>TCAGGCTCTTGGGACCTAGGCGGAGGGG<br>A                     | TGAACCCAACTG<br>TAATTTCTAAGC | GGATGGGTCAT<br>GGTGAAAAC | chr21:17962520-<br>17962755   | 235 | 430,22 |
| <b>MIR126</b>   | CGCTGGCGACGGGACATTACTTTTGG<br>TACGCGCTGTGACACTTCAAACCTCGTACC<br>GTGAGTAATAATGCGCCGTCCACGGCA                               | ATCAGCCAAGAA<br>GGCAGAAG     | GCAGAGCCAGA<br>AGACTCAGG | chr9:139564995-<br>139565299  | 304 | 76,28  |
| <b>MIR130A</b>  | TGCTGCTGGCCAGAGCTCTTTTCACATTGT<br>GCTACTGTCTGCACCTGTCACTAGCAGTG<br>CAATGTTAAAAGGGCATTGGCCGTGTAGT<br>G                     | AGGGACTGGGA<br>GAAGGAGTG     | TCACAGTAACG<br>GAGGCAGTG | chr11:57408648-<br>57408913   | 265 | 508,75 |
| <b>MIR130B</b>  | GGCCTGCCGACACTCTTCCCTGTTGCA<br>CTACTATAGGCCGCTGGGAAGCAGTGCAA<br>TGATGAAAGGGCATCGGTCAGGTC                                  | CTACCCAATTG<br>CTCCCTTC      | GGCACCTCAAC<br>CTTCTCAAC | chr22:22007451-<br>22007729   | 278 | 260,19 |
| <b>MIR140</b>   | TGTGTCTCTCTGTGTCCTGCCAGTGTT<br>TTACCCTATGGTAGGTTACGTCATGCTGTT<br>CTACCACAGGGTAGAACCACGGACAGGAT<br>ACCGGGGCACC             | TTGGTGTGGGT<br>TAACTTGC      | TAAACCAGCAAG<br>GGGATGTC | chr16:69966857-<br>69967152   | 295 | 119,14 |
| <b>MIR141</b>   | CGGCCGGCCCTGGGTCCATCTTCCAGTAC<br>AGTGTTGGATGGTCTAATTGTGAAGCTCCT                                                           | CACAGTCGACCT<br>TGAGCTTG     | TGTCTCCTTCCC<br>ATTGTTCC | chr12:7073170-<br>7073458     | 288 | 310,76 |

|                |                                                                                                                       |                              |                            |                              |     |         |
|----------------|-----------------------------------------------------------------------------------------------------------------------|------------------------------|----------------------------|------------------------------|-----|---------|
|                | AACACTGTCTGGTAAAGATGGCTCCCGGG<br>TGGGTTTC                                                                             |                              |                            |                              |     |         |
| <b>MIR142</b>  | GACAGTGCAGTCACCATAAAGTAGAAAG<br>CACTACTAACAGCACTGGAGGGTGTAGTG<br>TTTCCTACTTTATGGATGAGTGTACTGTG                        | GGATCTTAGGAA<br>GCCACAAGG    | GAGGCCTTTCA<br>GGCATCTG    | chr17:56408483-<br>56408752  | 269 | 267,49  |
| <b>MIR143</b>  | GCGCAGCGCCCTGTCTCCCAGCCTGAGG<br>TGCAGTGTGCATCTCTGGTCAGTTGGGA<br>GTCTGAGATGAAGCACTGTAGCTCAGGAA<br>GAGAGAAGTTGTTCTGCAGC | AGGCCACAGAC<br>AGGAAACAC     | TGGAGTCTGGA<br>AACACTCTGTC | chr5:148808362-<br>148808640 | 278 | 274,65  |
| <b>MIR145</b>  | CACCTTGTCTCACGGTCCAGTTTTCCCA<br>GGAATCCCTTAGATGCTAAGATGGGGATT<br>CCTGGAAATACTGTTCTTGAGGTCATGTT                        | GGCTGGATGCA<br>GAAGAGAAC     | CAGGGACAGCC<br>TTCTTCTTG   | chr5:148810156-<br>148810373 | 217 | 898,88  |
| <b>MIR146A</b> | CCGATGTGTATCCTCAGCTTTGAGAAGT<br>AATTCCATGGGTTGTGTGTCAGTGTGAGACC<br>TCTGAAATTCAGTTCTTCAGCTGGGATATC<br>TCTGTCATCGT      | GCAGCTGCATT<br>GGATTTACC     | TCTGTCTCCAGT<br>CTTCCAAGC  | chr5:159912280-<br>159912513 | 233 | 605,62  |
| <b>MIR148B</b> | CAAGCACGATTAGCATTGAGGTGAAGTT<br>CTGTTATACACTCAGGCTGTGGCTCTCTG<br>AAAGTCAGTGCATCACAGAAGTTTGTCTCG<br>AAAGCTTTCTA        | CACCCAATCTCC<br>CACAAAAC     | AAGTTTTTGTCAA<br>AGGGCAAG  | chr12:54730979-<br>54731269  | 290 | 144,44  |
| <b>MIR150</b>  | CTCCCCATGGCCCTGTCTCCCAACCCTTG<br>TACCAGTGTGGGCTCAGACCCTGGTACA<br>GGCCTGGGGGACAGGGACCTGGGGAC                           | TGGGTATAAGG<br>CAGGGACTG     | ACTTTGCGCATC<br>ACACAGAG   | chr19:50003876-<br>50004176  | 300 | 58,29   |
| <b>MIR15A</b>  | CCTTGGAGTAAAGTAGCAGCACATAATGG<br>TTTGTGGATTTTAAAAGGTGCAGGCCATA<br>TTGTGCTGCCTCAAAAATACAAGG                            | ATATTCTTTAGG<br>CGCGAATG     | CAACCTTACTTC<br>AGCAGCACAG | chr13:50623133-<br>50623357  | 224 | 177,41  |
| <b>MIR15B</b>  | TTGAGGCCTTAAAGTACTGTAGCAGCACA<br>TCATGGTTTACATGCTACAGTCAAGATGCG<br>AATCATTATTTGCTGCTCTAGAAATTTAAG<br>GAAATTCAT        | GCCATGGAATTG<br>ACTTGGAC     | ACGTGCTGCTA<br>GAGTGGAAC   | chr3:160122269-<br>160122532 | 263 | 151,49  |
| <b>MIR185</b>  | AGGGGGCGAGGGATTGGAGAGAAAGGCA<br>GTTCCCTGATGGTCCCCTCCCAGGGGCTG<br>GCTTTCCTCTGGTCCTTCCCCTCCCA                           | AGACCTGCTGG<br>CTAGAGCTG     | CAAGGGAAGGC<br>CATAAACAG   | chr22:20020626-<br>20020816  | 190 | 1133,39 |
| <b>MIR186</b>  | TGCTTGTAACTTTCCAAAGAATTCTCCTTT<br>GGGCTTTCTGGTTTTATTTAAAGCCCAAAG<br>GTGAATTTTTTGGGAAGTTTGAGCT                         | CCTTTGGGAACC<br>ATTATAATTAAG | TTGACATTCACA<br>TGCTTCAGG  | chr1:71533243-<br>71533442   | 199 | 200,79  |

|                 |                                                                                                                             |                                  |                            |                              |     |          |
|-----------------|-----------------------------------------------------------------------------------------------------------------------------|----------------------------------|----------------------------|------------------------------|-----|----------|
| <b>MIR188</b>   | TGCTCCCTCTCTCACATCCCTTGATGGT<br>GGAGGGTGAGCTTTCTGAAAACCCCTCCC<br>ACATGCAGGGTTTGCAGGATGGCGAGCC                               | TTGCCTCCTAGA<br>GCATACCC         | GGAGAAAGGAC<br>ATGGCTGAG   | chrX:49768078-<br>49768291   | 213 | 661,15   |
| <b>MIR190B</b>  | TGCTTCTGTGTGATATGTTTGATATTGGGT<br>TGTTTAATTAGGAACCAACTAAATGTCAA<br>CATATTCTTACAGCAGCAG                                      | CAAAGGCCAGG<br>AGCTTGTAG         | AGGAGCCCCAG<br>AGATTGAAG   | chr1:154166115-<br>154166411 | 296 | 164,66   |
| <b>MIR191</b>   | CGGCTGGACAGCGGGCAACGGAATCCCA<br>AAAGCAGCTGTTGTCTCCAGAGCATTCCA<br>GCTGCGCTTGGATTTCTGCCCTGCTCTC<br>CTGCCT                     | CAACCTACTCCC<br>GGGTCTTC         | CTCCCACGTCTA<br>CACCCATC   | chr3:49057949-<br>49058225   | 276 | 382,16   |
| <b>MIR192</b>   | GCCGAGACCGAGTGCACAGGGCTCTGAC<br>CTATGAATTGACAGCCAGTGCTCTCGTCT<br>CCCCTCTGGCTGCCAATTCCATAGGTCAC<br>AGGTATGTTTCGCCTCAATGCCAGC | TACCCACGAAGA<br>AGGAGAGG         | ATTCACGGGGA<br>ATGAGACAG   | chr11:64658514-<br>64658806  | 292 | 81371,75 |
| <b>MIR193A</b>  | CGAGGATGGGAGCTGAGGGCTGGGTCTT<br>TGCGGGCGAGATGAGGGTGTCGGATCAA<br>CTGGCCTACAAAGTCCCAGTTCTCGGCC<br>CCG                         | GAGGGACACCC<br>AGAGCTTC          | GCACCTACCA<br>CTCCTTCTC    | chr17:29886937-<br>29887194  | 257 | 257,82   |
| <b>MIR193B</b>  | GTGGTCTCAGAATCGGGGTTTTGAGGGCG<br>AGATGAGTTTATGTTTTATCCAACTGGCCC<br>TCAAAGTCCCGCTTTTGGGGTCAT                                 | CCAAACTCTTGC<br>CTCAAAGG         | TGGTAGCTCTCT<br>GCCCTCAC   | chr16:14397756-<br>14397947  | 191 | 923,61   |
| <b>MIR1941</b>  | ATGGTGTTATCAAGTGTAACAGCAACTCCA<br>TGTGGACTGTGTACCAATTTCCAGTGGAG<br>ATGCTGTTACTTTTTGATGGTTACCAA                              | AAATCGAGACTT<br>TCTTCTGTGAA<br>C | TCAAATGAGAGT<br>CCAAGTGACC | chr1:220291455-<br>220291646 | 191 | 423,69   |
| <b>MIR1942</b>  | TGGTCCCGCCCCCTGTAACAGCAACTCC<br>ATGTGGAAGTGCCCACTGGTTCCAGTGGG<br>GCTGCTGTTATCTGGGGCGAGGGCCAG                                | AAGAAGCCTCG<br>GTGAAAAGAC        | ACCGACAGCCC<br>TCCACTAC    | chr11:64658743-<br>64659016  | 273 | 72166,90 |
| <b>MIR195</b>   | AGCTTCCCTGGCTCTAGCAGCACAGAAAT<br>ATTGGCACAGGGAAGCGAGTCTGCCAATA<br>TTGGCTGTGCTGCTCCAGGCAGGGTGGT<br>G                         | ATCTCCAGGGC<br>AGTTTCAAG         | GCCTGTTCCCTC<br>TTCTCTCC   | chr17:6920897-<br>6921095    | 198 | 994,44   |
| <b>MIR196A1</b> | GTGAATTAGGTAGTTTCATGTTGTTGGGCC<br>TGGGTTTCTGAACACAACAACATTAACCA<br>CCCGATTAC                                                | CTTCTGTTGGGG<br>AAGAGGTG         | ATCCTTGTTGCT<br>CCTGGATG   | chr17:46709750-<br>46710021  | 271 | 161,96   |
| <b>MIR196A2</b> | TGCTCGCTCAGCTGATCTGTGGCTTAGGT<br>AGTTTCATGTTGTTGGGATTGAGTTTTGAA<br>CTCGGCAACAAGAACTGCCTGAGTTACA<br>TCAGTCGGTTTTCTGTCGAGGGC  | AATTTCTTCCTT<br>CCCCAACC         | GAGAGGACGGC<br>ATAAAGCAG   | chr12:54385476-<br>54385762  | 286 | 8,04     |

|                |                                                                                                                |                       |                      |                          |     |             |
|----------------|----------------------------------------------------------------------------------------------------------------|-----------------------|----------------------|--------------------------|-----|-------------|
| <b>MIR19B1</b> | CACTGTTCTATGGTTAGTTTTGCAGGTTTGCATCCAGCTGTGTGATATTCTGCTGTGCAATCCATGCAAAGTACTGACTGTGGTAGTG                       | GCTGTAGAACTCAGCTTCG   | CAATCCCCACCAAACTCAAC | chr13:92003412-92003634  | 222 | 12666087,22 |
| <b>MIR19B2</b> | ACATTGCTACTTACAATTAGTTTTGCAGGTTTGCATTTTCAGCGTATATATGTATATGTGGCTGTGCAAATCCATGCAAAGTACTGATTGTGATAATGT            | AACAGATGGTGGGACTGTG   | TGCTGGAGATACGCATGAAG | chrX:133303674-133303948 | 274 | 14716,79    |
| <b>MIR200A</b> | CCGGGCCCTGTGAGCATCTTACCGGACAGTGCTGGATTTCCAGCTTGACTCTAACACTGTCTGGTAACGATGTTCAAAGGTGACCCGC                       | GGCCTGTGTGAGTCTCAG    | CCCATCCCTGGAGTAGGAG  | chr1:1103118-1103367     | 249 | 136,48      |
| <b>MIR200B</b> | CCAGCTCGGGCAGCCGTGGCCATCTTACTGGGCAGCATTGGATGGAGTCAGGTCTCTATACTGCCTGGTAATGATGACGGCGGAGCCCTGCACG                 | CCCCAGCTACTGAGCTTCC   | ATTCCGGGGTCTCTGAGATG | chr1:1102443-1102745     | 302 | 0,00        |
| <b>MIR200C</b> | CCCTCGTCTTACCCAGCAGTGTGGGTGCGGTTGGGAGTCTCTAATACTGCCGGGTAATGATGGAGG                                             | AGGGATCTGCA GCTTTTCC  | AACAAGAACCACCCCTTGTG | chr12:7072807-7073047    | 240 | 29,54       |
| <b>MIR21</b>   | TGTCGGGTAGCTTATCAGACTGATGTTGACTGTTGAATCTCATGGCAACACCAGTCGATGGGCTGTCTGACA                                       | TTTATCAAATCTGCCTGACTG | GCTGCATTATGGCACAAAAG | chr17:57918579-57918810  | 231 | 377,84      |
| <b>MIR214</b>  | GGCCTGGCTGGACAGAGTTGTCATGTGTCTGCCTGTCTACACTTGCTGTGCAGAACATCCGCTCACCTGTACAGCAGGCACAGACAGGCAGTCACATGACAACCCAGCCT | TCCCTTTCCCCTACTCTCC   | GCCCCTCATTTTGGTTGTAG | chr1:172107879-172108117 | 238 | 628,60      |
| <b>MIR22</b>   | GGCTGAGCCGCAGTAGTTCTTCAGTGGCAAGCTTTATGTCCTGACCCAGCTAAAGCTGCCAGTTGAAGAACTGTTGCCCTCTGCC                          | CAGCGAGGTAAACAGCTTCC  | TGTCACCTTCCAGATGATGG | chr17:1617164-1617449    | 285 | 236,01      |
| <b>MIR23A</b>  | GGCCGGCTGGGGTTCCTGGGGATGGGATTTGCTTCTGTACAAATCACATTGCCAGGATTTCCAACCGACC                                         | TGATCAAAGGAA GCATCTGG | GTGAACACGACTTGGTGTGG | chr19:13947297-13947588  | 291 | 0,00        |
| <b>MIR23B</b>  | CTCAGGTGCTCTGGCTGCTTGGGTTCCCTG GCATGCTGATTTGTGACTTAAGATTAATAACATTGCCAGGGATTACCACGCAACCACGACCTTGGC              | GCTGCACTGGCATTTTTATG  | TGCACCTGTTCTCCAATCTG | chr9:97847317-97847618   | 301 | 195,55      |
| <b>MIR241</b>  | CTCCGGTGCCTACTGAGCTGATATCAGTTCTCATTTTACACACTGGCTCAGTTCAGCAGGAACAGGAG                                           | TGTGGTAGCTCATGGCTGTG  | GGCACTTACAGACACGAAGG | chr9:97848139-97848390   | 251 | 363,25      |

|                |                                                                                                           |                           |                           |                              |     |            |
|----------------|-----------------------------------------------------------------------------------------------------------|---------------------------|---------------------------|------------------------------|-----|------------|
| <b>MIR242</b>  | CTCTGCCTCCCGTGCCTACTGAGCTGAAA<br>CACAGTTGGTTTGTGTACTGGCTCAGTT<br>CAGCAGGAACAGGG                           | CCAAGTCGTGTT<br>CACAGTGG  | CATCCCTCCTCC<br>AGACACAG  | chr19:13947018-<br>13947271  | 253 | 0,00       |
| <b>MIR25</b>   | GGCCAGTGTGAGAGGCGGAGACTTGGG<br>CAATTGCTGGACGCTGCCCTGGGCATTGC<br>ACTTGTCTCGGTCTGACAGTGCCGGCC               | CTCTGCCAATTG<br>TCTTCTTGG | GGGTCGCCTAC<br>TCACAAAAC  | chr7:99691143-<br>99691359   | 216 | 680914,55  |
| <b>MIR26A1</b> | GTGGCCTCGTTCAAGTAATCCAGGATAGG<br>CTGTGCAGGTCCCAATGGGCCTATTCTTG<br>GTTACTTGCACGGGGACGC                     | CTCTCCCGAGG<br>GAATGAAG   | CTTTGCCACAA<br>GACTCCTC   | chr3:38010851-<br>38011137   | 286 | 398,18     |
| <b>MIR26A2</b> | GGCTGTGGCTGGATTCAAGTAATCCAGGA<br>TAGGCTGTTTCCATCTGTGAGGCCTATTCT<br>TGATTACTTGTCTGGAGGCAGCT                | TGGTCATTGAGG<br>GGAAAAAG  | CAACCTGGCTC<br>AGGAAGAAG  | chr12:58218342-<br>58218560  | 218 | 749,41     |
| <b>MIR26B</b>  | CCGGGACCCAGTTCAAGTAATCAGGATA<br>GGTTGTGTGCTGTCCAGCCTGTTCTCCAT<br>TACTTGGCTCGGGGACCGG                      | CTCGGATGGGA<br>ATTGGATAC  | GCCTCAACCTCA<br>GCCTAGTG  | chr2:219267226-<br>219267488 | 262 | 407,90     |
| <b>MIR27A</b>  | CTGAGGAGCAGGGCTTAGCTGCTTGTGAG<br>CAGGGTCCACACCAAGTCGTGTTACAGT<br>GGCTAAGTTCGCCCCCAG                       | ATCACATTGCCA<br>GGGATTTC  | CCTGTTCTGCT<br>GAACTGAG   | chr19:13947122-<br>13947409  | 287 | 5838279,49 |
| <b>MIR27B</b>  | ACCTCTAACAAGGTGCAGAGCTTAGCT<br>GATTGGTGAACAGTGATTGTTTTCCGCTTT<br>GTTACAGTGGCTAAGTTCTGCACCTGAA<br>GAGAAGTG | ACCAGCTGAGG<br>AAGATGCTC  | ATTCCCAGCAG<br>GAGACAGTG  | chr9:97847692-<br>97847951   | 259 | 562,21     |
| <b>MIR28</b>   | GGTCCTTGCCCTCAAGGAGCTCACAGTCT<br>ATTGAGTTACCTTTCTGACTTTCCACTAG<br>ATTGTGAGCTCCTGGAGGGCAGGCACT             | GCCTTTTGCATG<br>GTAGACAAC | GCTCCTGCTGT<br>GTCAATCAC  | chr3:188406532-<br>188406813 | 281 | 134,25     |
| <b>MIR29A</b>  | ATGACTGATTTCTTTTGGTGTTCAGAGTCA<br>ATATAATTTCTAGCACCATCTGAAATCGG<br>TTAT                                   | TTGTGCCTGGGT<br>TAAAGAGC  | CCACATGCAATT<br>CAGGTCAG  | chr7:130561359-<br>130561639 | 280 | 103,55     |
| <b>MIR29B1</b> | CTTCAGGAAGCTGGTTTCATATGGTGGTTT<br>AGATTTAAATAGTGATTGTCTAGCACCATT<br>TGAAATCAGTGTTCTTGGGGG                 | TGCCAAAGCTCT<br>GTTTAGACC | TGTCCCATTAC<br>TTCTTTTGC  | chr7:130562192-<br>130562397 | 205 | 545,27     |
| <b>MIR29C</b>  | ATCTCTTACACAGGCTGACCGATTTCTCCT<br>GGTGTTACAGAGTCTGTTTTTGTCTAGCACC<br>ATTTGAAATCGGTTATGATGTAGGGGGA         | GGAGTATTCGG<br>CGTTGATTG  | TCCATCTTCCAG<br>GAAACCAC  | chr1:207975149-<br>207975352 | 203 | 1147,59    |
| <b>MIR30A</b>  | GCGACTGTAAACATCCTCGACTGGAAGCT<br>GTGAAGCCACAGATGGGCTTTCAGTCGGA<br>TGTTTGCAGCTGC                           | TACAGAATCGTT<br>GCCTGCAC  | TGCTGAAGCCC<br>TCTAAAAATG | chr6:72113112-<br>72113405   | 293 | 113,02     |

|                 |                                                                                                                                                          |                           |                               |                              |     |        |
|-----------------|----------------------------------------------------------------------------------------------------------------------------------------------------------|---------------------------|-------------------------------|------------------------------|-----|--------|
| <b>MIR30B</b>   | ACCAAGTTTCAGTTCATGTAAACATCCTAC<br>ACTCAGCTGTAATACATGGATTGGCTGGG<br>AGGTGGATGTTTACTTCAGCTGACTTGGA                                                         | TGTGAATGCTGT<br>GCCTGTTC  | CCCTGCCAGCT<br>AGACAATTAAC    | chr8:135812631-<br>135812917 | 286 | 85,27  |
| <b>MIR30C1</b>  | ACCATGCTGTAGTGTGTGTAAACATCCTAC<br>ACTCTCAGCTGTGAGCTCAAGGTGGCTGG<br>GAGAGGGTTGTTTACTCCTTCTGCCATGG<br>A                                                    | TGCCCTGAATAA<br>GGACATGAG | TGATTAGGGAG<br>GTCGCATTC      | chr1:41222791-<br>41223090   | 299 | 122,84 |
| <b>MIR30C2</b>  | AGATACTGTAAACATCCTACACTCTCAGCT<br>GTGGAAAGTAAGAAAGCTGGGAGAAGGCT<br>GTTTACTCTTTCT                                                                         | AAGAACTGAGCA<br>GGCAGCAC  | AACACGGGATA<br>GGATCAATTC     | chr6:72086612-<br>72086920   | 308 | 55,43  |
| <b>MIR30D</b>   | GTTGTTGTAAACATCCCCGACTGGAAGCT<br>GTAAGACACAGCTAAGCTTTCAGTCAGAT<br>GTTTGCTGCTAC                                                                           | AGGAGAAATTGC<br>ACTTGGTG  | TTTCTGAGGTTT<br>TCCCACAC      | chr8:135817053-<br>135817349 | 296 | 37,21  |
| <b>MIR30E</b>   | GGGCAGTCTTTGCTACTGTAAACATCCTTG<br>ACTGGAAGCTGTAAGGTGTTTCAGAGGAGC<br>TTTCAGTCGGATGTTTACAGCGGCAGGCT<br>GCCA                                                | TTGGATTAGCAA<br>GCCCTCTG  | TCTGAGAGAGG<br>AGGGAAGGAC     | chr1:41219977-<br>41220193   | 216 | 543,85 |
| <b>MIR320A</b>  | GCTTCGCTCCCCTCCGCCTTCTCTTCCCG<br>GTTCTTCCCGGAGTCGGGAAAAGCTGGGT<br>TGAGAGGGCGAAAAAGGATGAGGT                                                               | GTCACAACCTCA<br>CCTGCAAC  | GTGGTGGCCGA<br>CAAAACC        | chr8:22102390-<br>22102689   | 299 | 84,79  |
| <b>MIR320B1</b> | AATTAATCCCTCTCTTTCTAGTTCTTCTTAG<br>AGTGAGGAAAAGCTGGGTTGAGAGGGCA<br>AACAAATTAATAATTAATT                                                                   | AGAGCACAGCC<br>TGAAAGAGC  | CACTTGGCCATA<br>TCTTATCCAC    | chr1:117214227-<br>117214491 | 264 | 67,46  |
| <b>MIR320B2</b> | TGTTATTTTTTGTCTTCTACCTAAGAATTCT<br>GTCTCTTAGGCTTTCTTCCCAGATTTCC<br>CAAAGTTGGGAAAAGCTGGGTTGAGAGGG<br>CAAAGGAAAAAAAAAAGAATTCTGTCTCTG<br>ACATAATTAGATAGGGAA | TCAGGCAACCAT<br>CTCATTTG  | CTCAAACCACCA<br>CCACCTTG      | chr1:224444674-<br>224444911 | 237 | 286,73 |
| <b>MIR320C1</b> | TTTGCATTAATAAATGAGGCCTTCTCTTCCC<br>AGTTCTTCCCAGAGTCAGGAAAAGCTGGG<br>TTGAGAGGGTAGAAAAAATGATGTAGG                                                          | CTGGCAAACAG<br>GCATGTGAC  | TTCCCTTAGTCT<br>GTGTTTCATTCAG | chr18:19263369-<br>19263671  | 302 | 0,00   |
| <b>MIR320C2</b> | CTTCTCTTCCAGTTCTTCCCAGAATTGGG<br>AAAAGCTGGGTTGAGAGGGT                                                                                                    | TCCTAGGCTCAA<br>GCGATCTG  | TGGCCACTCTGT<br>ATCTCTTCC     | chr18:21901497-<br>21901783  | 286 | 80,35  |
| <b>MIR320D1</b> | TTCTCGTCCCAGTTCTTCCCAAAGTTGAGA<br>AAAGCTGGGTTGAGAGGA                                                                                                     | TCCACCATAACA<br>ACAGCCTTC | CCTCTTTGCTTC<br>TCTCTGCTG     | chr13:41301903-<br>41302206  | 303 | 33,25  |
| <b>MIR320D2</b> | TTCTCTTCCCAGTTCTTCTTGGAGTCAGGA<br>AAAGCTGGGTTGAGAGGA                                                                                                     | CACCTTTAAGCA<br>AGTGGGAAC | TGCATTTTTCTC<br>CAACAACC      | chrX:140008211-<br>140008445 | 234 | 126,62 |



|                  |                                                                                                                                 |                            |                             |                               |     |              |
|------------------|---------------------------------------------------------------------------------------------------------------------------------|----------------------------|-----------------------------|-------------------------------|-----|--------------|
| <b>MIR320E</b>   | GCCTTCTCTTCCCAGTTCTTCCTGGAGTC<br>GGGGAAAAGCTGGGTGAGAAGGT                                                                        | TTGGTGGACGC<br>CTGTAATTC   | GCCAGGGTGGT<br>CTCAATC      | chr19:47212457-<br>47212754   | 297 | 59,18        |
| <b>MIR342</b>    | GAAACTGGGCTCAAGGTGAGGGGTGCTAT<br>CTGTGATTGAGGGACATGGTTAATGGAAT<br>TGTCTCACACAGAAATCGCACCCGTCACC<br>TTGGCCTACTTA                 | GCCCATGTCATA<br>TTGTGTGC   | GTC CGAAGTTC<br>CTTCCACAG   | chr14:100575902-<br>100576175 | 273 | 463,56       |
| <b>MIR516A1</b>  | TCTCAGGCTGTGACCTTCTCGAGGAAAGA<br>AGCACTTTCTGTTGTCTGAAAGAAAAGAAA<br>GTGCTTCCTTTCAGAGGGTTACGGTTTGA<br>GA                          | CAAACAGGGCC<br>AATAAATGC   | CCCACCATTATC<br>CACGTCTG    | chr19:54259922-<br>54260143   | 221 | 421,00       |
| <b>MIR516A2</b>  | TCTCAGGTTGTGACCTTCTCGAGGAAAGA<br>AGCACTTTCTGTTGTCTGAAAGAAAAGAAA<br>GTGCTTCCTTTCAGAGGGTTACGGTTTGA<br>GA                          | CAAACAGGGCC<br>AATAAATGC   | CCTGGGCAACA<br>GATACCTTG    | chr19:54264309-<br>54264587   | 278 | 190,55       |
| <b>MIR92A1</b>   | CTTTCTACACAGGTTGGGATCGGTTGCAA<br>TGCTGTGTTTCTGTATGGTATTGCACTTGT<br>CCCGGCCTGTTGAGTTTG                                           | CCATGCAAAACT<br>GACTGTGG   | GCCAGAATTTAT<br>ACTGCCAAATC | chr13:92003528-<br>92003815   | 287 | 10591398,01  |
| <b>MIR92A2</b>   | TCATCCCTGGGTGGGGATTTGTTGCATTA<br>CTTGTGTTCTATATAAAGTATTGCACTTGT<br>CCCGGCCTGTGGAAGA                                             | TGTGCAAATCCA<br>TGCAAAAC   | GGTCCTGCGGT<br>TTACAGATG    | chrX:133303420-<br>133303715  | 295 | 13648,43     |
| <b>MIR93</b>     | CTGGGGGCTCCAAAGTGCTGTTGCGTGCAG<br>GTAGTGTGATTACCCAACCTACTGCTGAG<br>CTAGCACTTCCCGAGCCCCCGG                                       | GTGGTTGGGGT<br>CTGTTTCAC   | AGGGAGACCAG<br>ACCCTTTTG    | chr7:99691312-<br>99691534    | 222 | 150877866,18 |
| <b>MIR98</b>     | AGGATTCTGCTCATGCCAGGGTGAGGTAG<br>TAAGTTGTATTGTTGTGGGGTAGGGATATT<br>AGGCCCAATTAGAAGATAACTATACA<br>TACTACTTTCCCTGGTGTGTGGCATATTCA | GATTGTACCAA<br>GCCTGCAC    | TCTGTCCCCTTC<br>CATGTCTC    | chrX:53583109-<br>53583418    | 309 | 61,07        |
| <b>MIR99A</b>    | CCCATTGGCATAAACCCGTAGATCCGATC<br>TTGTGGTGAAGTGGACCGCACAAAGCTCGC<br>TTCTATGGGTCTGTGTCAGTGTG                                      | TTTATGAAGGCC<br>TTTAATGGAG | GA ACTATTGTTG<br>AACGGCACTG | chr21:17911282-<br>17911512   | 230 | 100,71       |
| <b>MIR99B</b>    | GGCACCCACCCGTAGAACCGACCTTGCG<br>GGGCCTTCGCCGCACACAAGCTCGTGTCT<br>GTGGGTCCGTGTC                                                  | TGGATTCCAGGA<br>ACATTTGG   | AGACAGACAGG<br>GACCAGGAG    | chr19:52195680-<br>52195988   | 308 | 99,66        |
| <b>MIRLET7A1</b> | TGGGATGAGGTAGTAGTTGTATAGTTTTA<br>GGGTACACCCACCACTGGGAGATAACTA<br>TACAATCTACTGTCTTTCCTA                                          | CCTTCCTGTGGT<br>GCTCAACT   | CCAGGCCATAA<br>ACAAATGCT    | chr9:96938197-<br>96938415    | 218 | 629,57       |

|                  |                                                                                                   |                          |                                   |                               |     |         |
|------------------|---------------------------------------------------------------------------------------------------|--------------------------|-----------------------------------|-------------------------------|-----|---------|
| <b>MIRLET7A2</b> | AGGTTGAGGTAGTAGGTTGTATAGTTTAGA<br>ATTACATCAAGGGAGATAACTGTACAGCCT<br>CCTAGCTTTCT                   | AATGGCCCAAAT<br>AGGTGACA | ATAGGGAGAAA<br>AGGCCTGGA          | chr11:122017187-<br>122017385 | 198 | 700,75  |
| <b>MIRLET7A3</b> | GGGTGAGGTAGTAGGTTGTATAGTTTGGG<br>GCTCTGCCCTGCTATGGGATAACTATAACA<br>ATCTACTGTCTTTCT                | CTCCTCAGCCCT<br>CTTTCTC  | CCAAGGTCACA<br>CAGCAAGTG          | chr22:46508562-<br>46508840   | 278 | 190,64  |
| <b>MIRLET7B</b>  | CGGGGTGAGGTAGTAGGTTGTGTGGTTTC<br>AGGGCAGTGATGTTGCCCTCGGAAGATA<br>ACTATAAACCTACTGCCTTCCCTG         | CCAGAGAGCCA<br>GGGACTTC  | GGTCGTGTCAC<br>TGAGGTAGG          | chr22:46509400-<br>46509685   | 285 | 58,92   |
| <b>MIRLET7C</b>  | GCATCCGGGTTGAGGTAGTAGGTTGTATG<br>GTTTAGAGTTACACCCTGGGAGTTAACTGT<br>ACAACCTTCTAGCTTTCTTGGAGC       | GCCATATTTGGA<br>GGAGCTGA | GCCCAAATCAAT<br>GATCCAAG          | chr21:17912104-<br>17912314   | 210 | 477,98  |
| <b>MIRLET7D</b>  | CCTAGGAAGAGGTAGTAGGTTGCATAGTT<br>TTAGGGCAGGGATTTTGGCCACAAGGAGG<br>TAACTATACGACCTGCTGCCTTTCTTAGG   | TGCCAAGTAGAA<br>GACCAGCA | TTATCAATGTCA<br>GCACCATGC         | chr9:96941098-<br>96941341    | 243 | 292,94  |
| <b>MIRLET7E</b>  | CCCGGGCTGAGGTAGGAGGTTGTATAGTT<br>GAGGAGGACACCCAAGGAGATCACTATAC<br>GGCCTCCTAGCTTTCCCAGG            | CTGTCTGTCTGT<br>CGGGTCTG | GCAGGGACAAG<br>GACAGAAA           | chr19:52196023-<br>52196222   | 199 | 966,08  |
| <b>MIRLET7F1</b> | TCAGAGTGAGGTAGTAGATTGTATAGTTGT<br>GGGGTAGTGATTTTACCCTGTTTACAGGAGA<br>TAACTATACAATCTATTGCCTTCCCTGA | GGGGAAACCTTT<br>TGCTTCTT | ATGTCAAATA<br>ATTCTTCTGAGT<br>TTT | chr9:96938507-<br>96938759    | 252 | 51,25   |
| <b>MIRLET7F2</b> | TGTGGGATGAGGTAGTAGATTGTATAGTTT<br>TAGGGTCATACCCCATCTTGGAGATAACTA<br>TACAGTCTACTGTCTTTCCCACG       | GAGTAGCTGGC<br>CCACATAGG | AGGACCAGCCA<br>CTTCAAAGA          | chrX:53584009-<br>53584257    | 248 | 608,19  |
| <b>MIRLET7G</b>  | AGGCTGAGGTAGTAGTTTGTACAGTTTGA<br>GGGTCTATGATACCACCCGGTACAGGAGA<br>TAACTGTACAGGCCACTGCCTTGCCA      | AGCCTCTGCTGT<br>GAGGATGT | GGTTTCCCAGA<br>GATGAGCAG          | chr3:52302247-<br>52302444    | 197 | 1443,21 |
| <b>MIRLET7I</b>  | CTGGCTGAGGTAGTAGTTTGTGCTGTTGG<br>TCGGGTTGTGACATTGCCCGCTGTGGAGA<br>TAACTGCGCAAGCTACTGCCTTGCTA      | GAAGGCAAAGG<br>AAAAGAAGG | AACTAACGGTTT<br>CCGTGGTG          | chr12:62997369-<br>62997658   | 289 | 101,34  |

**Supplementary Table S2. Evaluation workflow applied to Next Generation Sequencing-based mutation-analysis in 96 miRNA stem-loop regions in 1,213 individuals with CAKUT.**

| <b>Filters applied</b>                                                                                    | <b># of remaining variants</b> |
|-----------------------------------------------------------------------------------------------------------|--------------------------------|
| <b>All variants detected</b>                                                                              | <b>116,431</b>                 |
| ➤ Exclude variant if present in common dnSNP132 (MAF >1%)                                                 | <b>111,867</b>                 |
| ➤ Exclude variant if variant frequency in NGS-reads $\leq$ 25%                                            | <b>32,510</b>                  |
| ➤ Exclude variant if present in $\geq$ 5% of subjects                                                     | <b>6,740</b>                   |
| ➤ Exclude variant if coverage $\leq$ 10x                                                                  | <b>1,440</b>                   |
| ➤ Exclude variant if not located within miRNA stem-loop region                                            | <b>300</b>                     |
| ➤ Exclude if nucleotide conservation score (PhyloP) <2                                                    | <b>176</b>                     |
| ➤ Inspection of NGS-alignment and Sanger Confirmation                                                     | <b>47</b>                      |
| <b>Total number of variants considered</b><br>(Shared variants among multiple individuals counted as one) | <b>18</b>                      |
| ➤ Evolutionary conserved at least down to zebrafish, not present in public databases                      | <b>2</b>                       |
| <b>Total number of potentially pathogenic variants detected</b>                                           | <b>2</b>                       |

**Supplementary Table S3. Unlikely pathogenic variants and benign variants detected in 96 miRNA stem-loop regions in 1,213 individuals with CAKUT.**

| Gene                                                                            | Genomic variant    | Mm      | Gg  | Xt | Dr | SNP ID      | EVS          | 1000G      | Family ID | Ind. ID | State | Origin      | Phenotype                     |
|---------------------------------------------------------------------------------|--------------------|---------|-----|----|----|-------------|--------------|------------|-----------|---------|-------|-------------|-------------------------------|
| <b>Unlikely pathogenic variants (known SNPs, bad evolutionary conservation)</b> |                    |         |     |    |    |             |              |            |           |         |       |             |                               |
| MIR30E                                                                          | chr1:41220114T>C   | T       | T   | T  |    | n/a         | unknown      | unknown    | UROGE340  | -1      | het   | unknown     | UPJO                          |
| MIR26B                                                                          | chr2:219267373G>C  | G       | NA  | G  |    | n/a         | unknown      | unknown    | A1402     | -21     | het   | Egypt       | Rt duplex                     |
| MIR141                                                                          | chr12:7073282C>T   | C       | C   |    |    | n/a         | unknown      | unknown    | A1548     | -21     | het   | Kuwait      | UPJO                          |
|                                                                                 |                    |         |     |    |    |             |              |            | A3903     | -21     | het   | India       | Lt hypoplastic kidney         |
| MIR196A2                                                                        | chr12:54385585G>T  | G       | A   | G  | A  | n/a         | unknown      | unknown    | A3957     | -21     | het   | India       | B hydronephrosis, anorect. MF |
| MIRLET7I                                                                        | chr12:62997517G>A  | G       | G   | G  | A  | n/a         | unknown      | unknown    | A1549     | -21     | het   | Kuwait      | UPJO                          |
| MIR342                                                                          | chr14:100576067G>A | G       |     |    |    | n/a         | unknown      | unknown    | A5120     | -21     | het   | Macedonia   | VUR, Renal agenesis L         |
| MIR185                                                                          | chr22:20020729G>A  | G       |     |    |    | n/a         | unknown      | unknown    | A2246     | -21     | het   | Kuwait      | B hydronephrosis              |
| MIR130B                                                                         | chr22:22007595C>G  | C       |     |    |    | n/a         | unknown      | unknown    | A2037     | -22     | het   | Switzerland | Rt VUR, Lt renal agenesis     |
| MIR190B                                                                         | chr1:154166182A>G  | A       | A   |    |    | rs376882956 | G=7/A=10293  | unknown    | P43       | -1      | het   | unknown     | UPJO                          |
| MIR1941                                                                         | chr1:220291556G>A  | G       | G   | G  |    | rs369094973 | A=1/G=10283  | unknown    | UROGE045  | -1      | het   | unknown     | UPJO                          |
| MIR10B                                                                          | chr2:177015139G>A  | C       | C   | C  | C  | rs200015643 | T=4/C=10296  | unknown    | A946      | -21     | het   | Hungary     | VUR, Rt duplex, dysplasia     |
| MIR320A                                                                         | chr8:22102546G>A   | G       |     |    |    | rs372063644 | A=6/G=10292  | A=1/G=5007 | A1931     | -22     | het   | Germany     | VUR                           |
| MIR320A                                                                         | chr8:22102519G>A   | G       |     |    |    | rs200301891 | A=22/G=10278 | A=5/G=5003 | A1259     | -21     | het   | Macedonia   | VUR, Lt duplex                |
|                                                                                 |                    |         |     |    |    |             |              |            | A2901     | -21     | het   | Macedonia   | Lt single cortical cyst       |
|                                                                                 |                    |         |     |    |    |             |              |            | A3044     | -21     | het   | Albania     | VUR                           |
|                                                                                 |                    |         |     |    |    |             |              |            | A5058     | -21     | het   | Albania     | Hypoplastic Kidney Rt         |
|                                                                                 |                    |         |     |    |    |             |              |            | A5139     | -21     | het   | Russian     | NS, B VUR                     |
|                                                                                 |                    |         |     |    |    |             |              |            | A960      | -21     | het   | Albania     | UPJO                          |
|                                                                                 |                    |         |     |    |    |             |              |            | VURF0139  | -772    | het   | unknown     | Healthy                       |
|                                                                                 |                    |         |     |    |    |             |              |            |           | -774    | het   | unknown     | VUR                           |
| -775                                                                            | het                | unknown | VUR |    |    |             |              |            |           |         |       |             |                               |
| -776                                                                            | het                | unknown | VUR |    |    |             |              |            |           |         |       |             |                               |
| <b>Benign variants (non-segregation)</b>                                        |                    |         |     |    |    |             |              |            |           |         |       |             |                               |

|               |                   |   |    |   |   |             |             |            |       |     |     |           |                  |
|---------------|-------------------|---|----|---|---|-------------|-------------|------------|-------|-----|-----|-----------|------------------|
| <i>MIR93</i>  | chr7:99691447C>T  | C | NA | C | C | n/a         | unknown     | unknown    | A1089 | -21 | het | Macedonia | UPJO             |
|               |                   |   |    |   |   |             |             |            | A1905 | -21 | het | Serbia    | VUR              |
|               |                   |   |    |   |   |             |             |            |       | -22 | WT  | Serbia    | VUR              |
|               |                   |   |    |   |   |             |             |            |       | -11 | WT  | Serbia    | Healthy          |
|               |                   |   |    |   |   |             |             |            |       | -12 | het | Serbia    | Healthy          |
| <i>MIR126</i> | chr9:139565134C>T | C | C  | C | C | rs199992070 | T=1/C=10283 | A=2/G=5006 | A1243 | -21 | het | Germany   | ESRD             |
|               |                   |   |    |   |   |             |             |            |       | -32 | het | Germany   | Lt VUR, small LK |
|               |                   |   |    |   |   |             |             |            |       | -31 | WT  | Germany   | Lt VUR, small LK |
|               |                   |   |    |   |   |             |             |            | P1422 | -1  | het | unknown   | UPJO             |

Abbreviations used: *Mm*, *Mus musculus*; *Gg*, *Gallus gallus*; *Xt*, *Xenopus tropicalis*; *Dr*, *Danio rerio*; EVS, Exome variant Server; 1000G, 1000 Genomes Project; het, heterozygous; rt, right; VUR, vesicoureteral reflux
